# Supplementary material
Source: PubMed Central journal article supplement (PMC10852475)
Supplement: Suppl_Table1.pdf [file Suppl_Table1.pdf]

**Supplementary Table 1**

| <b>variable</b>              | <b>value</b>            | <b>bsr1</b> | <b>bsr2</b> | <b>f1</b> | <b>f2</b> | <b>c1</b> | <b>c2</b> |
|------------------------------|-------------------------|-------------|-------------|-----------|-----------|-----------|-----------|
| age                          | <67 years               | 5.83        | 0.04        | 0.51      | 0.00      | 9.14      | 0.00      |
|                              | 67 – 76 years           | -0.98       | -1.16       | -0.10     | -0.13     | 0.34      | 3.24      |
|                              | >76 years               | -4.10       | 1.34        | -0.46     | 0.13      | 6.71      | 3.22      |
| depression                   | current: no             | -4.75       | 0.82        | -0.24     | 0.04      | 3.91      | 0.78      |
|                              | past: yes               | 5.31        | 0.83        | 0.64      | 0.14      | 8.39      | 2.25      |
|                              | current or past: yes    | 1.82        | -2.24       | 0.29      | -0.52     | 0.95      | 17.84     |
| education                    | university: yes         | 1.26        | 1.77        | 0.12      | 0.18      | 0.55      | 6.71      |
|                              | university: no          | -1.25       | -1.75       | -0.07     | -0.10     | 0.31      | 3.82      |
|                              | >13 years               | 0.52        | 1.07        | 0.04      | 0.09      | 0.08      | 2.10      |
|                              | <13 years               | -0.51       | -1.06       | -0.03     | -0.06     | 0.05      | 1.42      |
| dementia worries             | no                      | -4.08       | 0.19        | -0.48     | 0.02      | 6.01      | 0.08      |
|                              | few                     | -1.95       | -1.36       | -0.21     | -0.14     | 1.44      | 3.72      |
|                              | some                    | 3.67        | 1.13        | 0.43      | 0.15      | 5.00      | 3.54      |
|                              | significant             | 3.21        | -0.07       | 0.49      | -0.01     | 3.73      | 0.02      |
| motivation                   | extrinsic               | -6.94       | 0.95        | -0.55     | 0.07      | 13.74     | 1.48      |
|                              | intrinsic               | 7.08        | -0.94       | 0.46      | -0.06     | 11.53     | 1.24      |
| symptom onset                | <22 months              | 1.94        | -1.90       | 0.20      | -0.22     | 1.36      | 9.31      |
|                              | 22 – 40 months          | -1.20       | -0.28       | -0.14     | -0.02     | 0.64      | 0.11      |
|                              | >40 months              | -0.54       | 2.39        | -0.06     | 0.23      | 0.13      | 11.07     |
| sex                          | female                  | -0.96       | -0.14       | -0.07     | -0.01     | 0.27      | 0.04      |
|                              | male                    | 0.95        | 0.14        | 0.07      | 0.01      | 0.27      | 0.04      |
| dementia family history      | no                      | 0.86        | -0.63       | 0.05      | -0.03     | 0.17      | 0.44      |
|                              | yes                     | -0.84       | 0.64        | -0.09     | 0.06      | 0.31      | 0.81      |
| first symptom                | attention deficit       | 2.45        | 0.86        | 0.60      | 0.26      | 2.75      | 3.15      |
|                              | memory impairment       | -0.63       | 1.56        | -0.04     | 0.10      | 0.08      | 3.39      |
|                              | orientation deficit     | -0.54       | -1.90       | -0.17     | -0.71     | 0.10      | 10.73     |
|                              | word finding impairment | 2.13        | 0.01        | 0.45      | 0.00      | 2.01      | 0.00      |
|                              | unspecified             | -2.51       | -1.96       | -0.34     | -0.29     | 2.13      | 9.42      |
| subjective memory impairment | no                      | -6.26       | -0.13       | -0.55     | -0.01     | 11.19     | 0.04      |
|                              | yes                     | 5.56        | 0.15        | 0.33      | 0.01      | 6.70      | 0.02      |

**Supplementary Table 1.** Provided are bootstrap-ratios (bsr), factor scores (f), and contributions (c) for all items within DICA components 1 and 2 respectively; contributions have been multiplied by 100
